# Supplementary material for: Mystery(n) Phenotypic Presentation in Europeans: Report of Three Further Novel Missense RNF213 Variants Leading to Severe Syndromic Forms of Moyamoya Angiopathy and Literature Review
Source: MDPI journal article supplement (doi:10.3390/ijms23168952), 2022-08-11
Supplement: s1 [file s1]

**Table S2:** *Selected MMA genes from the cerebral vascular malformations (Version 2.59) panel.*

| <b>Gene Symbol</b> | <b>Model of Inheritance</b> | <b>Phenotypes</b>                                                                                                     | <b>OMIM</b> |
|--------------------|-----------------------------|-----------------------------------------------------------------------------------------------------------------------|-------------|
| ACTA2              | Monoallelic                 | Moyamoya disease 5                                                                                                    | 102620      |
| GUCY1A3            | Biallelic                   | Moyamoya 6 with achalasia                                                                                             | 139396      |
| RNF213             | Both                        | {Moyamoya disease 2, susceptibility to}                                                                               | 613768      |
| SAMHD1             | Biallelic                   | Moyamoya disease                                                                                                      | 606754      |
| SLC2A10            | Biallelic                   | Arterial tortuosity syndrome;Moyamoya disease                                                                         | 606145      |
| CBL                | Monoallelic                 | Early-onset moyamoya angiopathy;Noonan syndrome-like disorder with or without juvenile myelomonocytic leukemia        | 165360      |
| MYH11              | Monoallelic                 | Moyamoya-like angiopath;Aortic aneurysm, familial thoracic 4                                                          | 160745      |
| NF1                | Monoallelic                 | Moyamoya disease;Neurofibromatosis, type 1                                                                            | 613113      |
| PCNT               | Biallelic                   | Moyamoya disease;Microcephalic osteodysplastic primordial dwarfism, type II                                           | 605925      |
| ATP7A              | X-Linked                    | Moyamoya disease                                                                                                      | 300011      |
| BRCC3              | X-Linked                    | Moyamoya disease                                                                                                      | 300617      |
| ELN                | Monoallelic                 | Moyamoya disease;Aneurysm, intracranial berry, 1                                                                      | 130160      |
| JAG1               | Monoallelic                 | Moyamoya disease;Alagille syndrome 1,                                                                                 | 601920      |
| NOTCH3             | Monoallelic                 | Cerebral Autosomal Dominant Arteriopathy with Subcortical Infarcts and Leukoencephalopathy (CADASIL);Moyamoya disease | 600276      |
| CCER2              | Monoallelic                 | Moyamoya disease                                                                                                      | 617634      |
| MRVI1              | Monoallelic                 | {Moyamoya angiopathy, susceptibility to}                                                                              | 604673      |
| PALD1              | Monoallelic                 | {Moyamoya angiopathy, susceptibility to}                                                                              | 614656      |
