# Supplementary material for: Mystery(n) Phenotypic Presentation in Europeans: Report of Three Further Novel Missense RNF213 Variants Leading to Severe Syndromic Forms of Moyamoya Angiopathy and Literature Review
Source: MDPI journal article supplement (doi:10.3390/ijms23168952), 2022-08-11
Supplement: s1 [file s1]

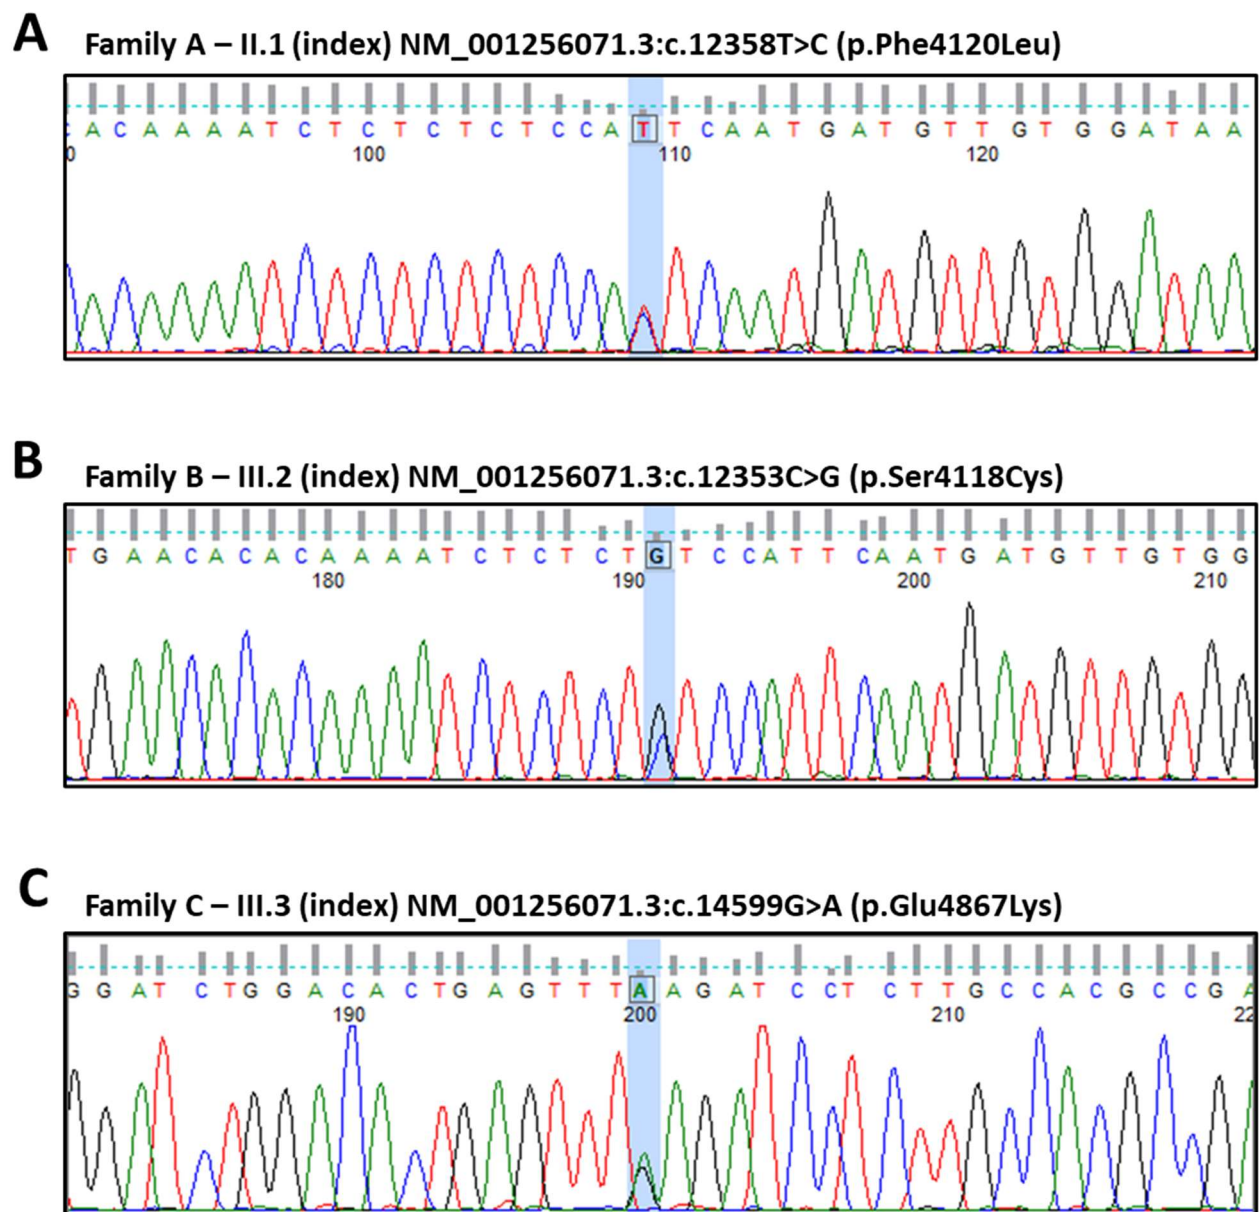

**Figure S1.** Electropherogram of the *RNF213* variants identified in probands from families A-C. Sanger sequencing of the specific *RNF213* exon for each index cases from families A-C. The identified heterozygous missense variants are highlighted with a light blue background.
