# Supplementary material for: Mystery(n) Phenotypic Presentation in Europeans: Report of Three Further Novel Missense RNF213 Variants Leading to Severe Syndromic Forms of Moyamoya Angiopathy and Literature Review
Source: MDPI journal article supplement (doi:10.3390/ijms23168952), 2022-08-11
Supplement: s1 [file s1]

**Table S3:** Distribution of variants reported in literature along RNF213 and in silico evaluation of their pathogenicity.

| Mutation             | Ethnicity | Domain        | PROVEAN |                            | Polyphen2 |                   | MutPred2             |                      | MAF (gnomAD)          | PMID references <sup>1</sup> |
|----------------------|-----------|---------------|---------|----------------------------|-----------|-------------------|----------------------|----------------------|-----------------------|------------------------------|
|                      |           |               | Score   | Prediction (cutoff = -2.5) | Score     | Prediction        | Score (cutoff = 0.5) | Score (cutoff = 0.5) |                       |                              |
| A529del              | European  | N-arm (stalk) | -5.648  | Deleterious                | n.a.      | n.a.              | n.a.                 | 0.000000             | 25278557              |                              |
| A1622V               | Asian     |               | -2.04   | Neutral                    | 0.220     | Benign            | 0.208                | 0.000171             | 25956231              |                              |
| M3891V               | Asian     |               | -1.694  | Neutral                    | 0.007     | Benign            | 0.129                | 0.000000             | 21048783              |                              |
| R3922Q               | European  | E3 (back)     | -2.667  | Deleterious                | 0.992     | Probably Damaging | 0.296                | 0.000032             | 25278557              |                              |
| A3927T               | European  |               | -2.178  | Neutral                    | 0.990     | Probably Damaging | 0.416                | 0.000004             | 30908154              |                              |
| V3933M               | Asian     |               | -1.883  | Neutral                    | 0.998     | Probably Damaging | 0.696                | 0.000004             | 25956231              |                              |
| N3962D               | European  | RING          | -1.289  | Neutral                    | 0.012     | Benign            | 0.118                | 0.000050             | 21799892              |                              |
| P3996_C3997delinsGLG | European  |               | -19.317 | Deleterious                | n.a.      | n.a.              | n.a.                 | 0.000000             | 33568546              |                              |
| C3997Y               | European  |               | -8.783  | Deleterious                | 1.000     | Probably Damaging | 0.886                | 0.000000             | 25278557              |                              |
| P4007R               | Asian     |               | -6.883  | Deleterious                | 1.000     | Probably Damaging | 0.816                | 0.000000             | 23110205              |                              |
| D4013N               | European  |               | -2.35   | Neutral                    | 0.909     | Possibly Damaging | 0.577                | 0.000008             | 21799892, 25278557    |                              |
| R4019C               | European  |               | -3.423  | Deleterious                | 0.992     | Probably Damaging | 0.649                | 0.000615             | 25278557              |                              |
| P4033L               | European  |               | -8.167  | Deleterious                | 1.000     | Probably Damaging | 0.666                | 0.000004             | 30908154              |                              |
| R4062Q               | European  |               | -2.8    | Deleterious                | 0.993     | Probably Damaging | 0.666                | 0.000000             | 21799892              |                              |
| I4076V               | Asian     |               | -0.163  | Neutral                    | 0.002     | Benign            | 0.212                | 0.000012             | 25278557              |                              |
| T4114R               | European  |               | -5.133  | Deleterious                | 1.000     | Probably Damaging | 0.848                | 0.000000             | 33568546              |                              |
| K4115del             | European  |               | -11.05  | Deleterious                | n.a.      | n.a.              | n.a.                 | 0.000000             | 25278557              |                              |
| S4118F               | European  |               | -5.4    | Deleterious                | 1.000     | Probably Damaging | 0.740                | 0.000000             | 26198278              |                              |
| S4118C               | European  | E3 (shell)    | -4.45   | Deleterious                | 1.000     | Probably Damaging | 0.735                | 0.000000             | This report           |                              |
| F4120L               | European  |               | -5.433  | Deleterious                | 1.000     | Probably Damaging | 0.697                | 0.000000             | 33568546, This report |                              |
| R4131C               | Asian     |               | -7.333  | Deleterious                | 1.000     | Probably Damaging | 0.841                | 0.000014             | 25956231              |                              |
| K4185E               | European  |               | -2.333  | Neutral                    | 0.995     | Possibly Damaging | 0.492                | 0.000000             | 31645973              |                              |
| A4188T               | European  |               | -2.081  | Neutral                    | 0.962     | Probably Damaging | 0.164                | 0.000000             | 31645973              |                              |
| D4273E               | European  |               | -2.7    | Deleterious                | 0.981     | Probably Damaging | 0.393                | 0.000000             | 25278557              |                              |
| Q4367L               | Asian     |               | -4.772  | Deleterious                | 0.012     | Benign            | 0.334                | 0.000000             | 23110205              |                              |
| V4567M               | Asian     |               | -0.595  | Neutral                    | 0.190     | Benign            | 0.236                | 0.000085             | 21048783              |                              |
| T4586P               | Asian     |               | -4      | Deleterious                | 1.000     | Probably Damaging | 0.845                | 0.000000             | 23110205              |                              |
| P4608S               | European  |               | -2.758  | Deleterious                | 0.478     | Possibly Damaging | 0.250                | 0.000004             | 21799892              |                              |
| L4631V               | Asian     |               | -1.85   | Neutral                    | 1.000     | Probably Damaging | 0.344                | 0.000000             | 23110205              |                              |
| K4732T               | European  |               | -2.067  | Neutral                    | 0.799     | Possibly Damaging | 0.339                | 0.000658             | 25278557              |                              |
| V4765M               | Asian     | E3 (core)     | -1.683  | Neutral                    | 0.997     | Probably Damaging | 0.280                | 0.000000             | 21048783              |                              |
| D4863N               | Asian     |               | -2.408  | Neutral                    | 0.372     | Benign            | 0.355                | 0.000060             | 21799892              |                              |
| E4867K               | European  |               | -2.2    | Neutral                    | 0.909     | Possibly Damaging | 0.607                | 0.000000             | This report           |                              |
| E4950D               | Asian     | CTD           | -1.483  | Neutral                    | 0.909     | Possibly Damaging | 0.339                | 0.000226             | 21799892, 23110205    |                              |
| E4950_F4951ins7      | European  |               | n.a.    | n.a.                       | n.a.      | n.a.              | n.a.                 | 0.000000             | 25278557              |                              |
| A5021V               | Asian     |               | -0.456  | Neutral                    | 0.128     | Benign            | 0.181                | 0.000311             | 21799892, 23110205    |                              |
| M5136I               | Asian     |               | -2.2    | Neutral                    | 0.473     | Possibly Damaging | 0.625                | 0.000000             | 23110205              |                              |
| D5160E               | Asian     |               | -1.533  | Neutral                    | 0.410     | Benign            | 0.240                | 0.000000             | 21799892              |                              |
| V5163I               | European  |               | -0.375  | Neutral                    | 0.919     | Possibly Damaging | 0.081                | 0.000152             | 25278557              |                              |
| E5176G               | Asian     |               | -3.892  | Deleterious                | 0.256     | Benign            | 0.308                | 0.000008             | 21799892              |                              |

<sup>1</sup>Unique identifier of published article in PubMed (pubmed.ncbi.nlm.nih.gov). Abbreviations: CTD = C-terminal domain; MAF = minor allele frequency; n.a.= not available.
