# Supplementary material for: Mystery(n) Phenotypic Presentation in Europeans: Report of Three Further Novel Missense RNF213 Variants Leading to Severe Syndromic Forms of Moyamoya Angiopathy and Literature Review
Source: MDPI journal article supplement (doi:10.3390/ijms23168952), 2022-08-11
Supplement: s1 [file s1]

Table S1: Demographical, clinical, and radiological features of European patients already reported in literature.

| Reference | Patient ID <sup>1</sup> | Proband Relative | Sex | Mutation                   | MMA/other cerebrovascular condition/ bilateral or unilateral | Age at onset (yrs) | MMA symptoms                      | Atypical angiographic features                                     | HBP  | Extracerebral arterial or cardiac anomalies                                                          | Hypertransaminasemia/Hepatitis                | Other systemic features                                                                          |
|-----------|-------------------------|------------------|-----|----------------------------|--------------------------------------------------------------|--------------------|-----------------------------------|--------------------------------------------------------------------|------|------------------------------------------------------------------------------------------------------|-----------------------------------------------|--------------------------------------------------------------------------------------------------|
| [13]      | MM004_n.r.IIn.r.10      | P                | M   | p.Arg4019Cys               | MMA/B                                                        | 3                  | n.r.                              | n.r.                                                               | n.r. | n.r.                                                                                                 | n.r.                                          | n.r.                                                                                             |
|           | MM096_IVn.r.4           | P                | M   |                            | MMA/B                                                        | 30                 | n.r.                              | n.r.                                                               | n.r. | n.r.                                                                                                 | n.r.                                          | n.r.                                                                                             |
|           | MM096_Vn.r.1            | R                | M   | p.Asp4013Asn               | MMA/B                                                        | 8                  | n.r.                              | n.r.                                                               | n.r. | n.r.                                                                                                 | n.r.                                          | n.r.                                                                                             |
|           | MM096_IIn.r.5           | R                | M   |                            | No                                                           | 56                 | n.r.                              | n.r.                                                               | n.r. | CAD                                                                                                  | n.r.                                          | n.r.                                                                                             |
|           | MM096_IIn.r.4           | R                | F   |                            | MMA/n.r.                                                     | 30                 | n.r.                              | n.r.                                                               | n.r. | n.r.                                                                                                 | n.r.                                          | n.r.                                                                                             |
|           | MM0011_IVn.r.11         | P                | F   | P.Glu4950_Phe4951Ins7      | MMA/B                                                        | 5                  | n.r.                              | n.r.                                                               | n.r. | n.r.                                                                                                 | n.r.                                          | n.r.                                                                                             |
|           | MM060_IIn.r.1           | P                | F   | p.Val5163Ile               | MMA/B                                                        | 8                  | n.r.                              | n.r.                                                               | n.r. | n.r.                                                                                                 | n.r.                                          | n.r.                                                                                             |
|           | MM006_IIn.r.1           | P                | M   | p.Arg3922Gln               | MMA/B                                                        | 5                  | n.r.                              | n.r.                                                               | n.r. | n.r.                                                                                                 | n.r.                                          | n.r.                                                                                             |
|           | MM006_IIn.r.6           | R                | F   |                            | MMA/B                                                        | 2.5                | n.r.                              | n.r.                                                               | n.r. | n.r.                                                                                                 | n.r.                                          | n.r.                                                                                             |
|           | MM044_IIn.r.8           | P                | M   | p.Arg4019Cys               | MMA/B                                                        | 6                  | n.r.                              | n.r.                                                               | n.r. | n.r.                                                                                                 | n.r.                                          | n.r.                                                                                             |
| [22]      | MM042_IIn.r.10          | P                | F   | p.Ala529del                | MMA/B                                                        | 50                 | n.r.                              | n.r.                                                               | n.r. | n.r.                                                                                                 | n.r.                                          | n.r.                                                                                             |
|           | MM131_IIn.r.11          | P                | M   | p.Lys4115del               | MMA/B                                                        | 0.75               | n.r.                              | n.r.                                                               | n.r. | n.r.                                                                                                 | n.r.                                          | n.r.                                                                                             |
|           | Proband                 | P                | F   | p.Ser4118Phe               | MMD/B                                                        | 0.25               | Acute onset of focal seizures     | Involvement of posterior cerebral and superior cerebellar arteries | n.r. | Marked narrowing of bilateral internal carotid arteries; mild stenosis of infrarenal abdominal aorta | Elevated transaminases; abnormal liver biopsy | None                                                                                             |
|           | Patient 1               | P                | M   | p.Asp4013Asn               | MMA/B                                                        | 44                 | CI                                | n.r.                                                               | n.r. | n.r.                                                                                                 | n.r.                                          | n.r.                                                                                             |
|           | IIn.r.2_fam 1           | P                | F   | p.Val4146Ala               | MMA/B                                                        | 21                 | TIA                               | n.r.                                                               | No   | Thickening of the carotid bulb in both internal carotid arteries, prolapse of mitral valve           | No                                            | None                                                                                             |
|           | IIn.r.1_FAM 2           | P                | F   | p.Arg4019Cys; p.Glu4042Lys | MMA/B                                                        | 28                 | CI                                | n.r.                                                               | n.r. | n.r.                                                                                                 | n.r.                                          | n.r.                                                                                             |
|           | IIn.r.2_FAM 3           | P                | F   | p.Trp4677Leu               | MMA/B                                                        | 27                 | Paresis                           | n.r.                                                               | Yes  | None                                                                                                 | n.r.                                          | n.r.                                                                                             |
|           | IIn.r.2_FAM 3           | R                | F   |                            | MMA/U                                                        | 48                 | CI                                | n.r.                                                               | Yes  | Severe stenosis in the renal arteries                                                                | n.r.                                          | n.r.                                                                                             |
|           | M001_6                  | P                | F   | p.Ala1135Val p.Cys4032Arg  | MMA/B                                                        | 13                 | TIA, headache, movement disorders | Vertebrobasilar impairment                                         | No   | No                                                                                                   | n.r.                                          | No                                                                                               |
|           | M002_3                  | P                | M   | p.Arg4062Gln               | MMA/B                                                        | 5                  | CI, TIA, headache                 | None                                                               | Yes  | No                                                                                                   | n.r.                                          | No                                                                                               |
| [30]      | M003_4                  | P                | M   | p.Asp4122Val               | MMA/B                                                        | 5                  | TIA, headache                     | Posterior cerebral artery occlusion                                | Yes  | Severe pulmonary arterial hypertension                                                               | Regressive unresolved hepatitis at 14 months  | No                                                                                               |
|           | M004_3                  | P                | M   | p.Thr1705Lys; p.H4014Asn   | MMA/B                                                        | 3                  | CI, TIA, headache                 | None                                                               | No   | No                                                                                                   | n.r.                                          | No                                                                                               |
|           | M005_5                  | P                | F   | p.Pro1721Leu               | MMA/U                                                        | 22                 | Headache                          | None                                                               | No   | n.r.                                                                                                 | n.r.                                          | Left morning glory syndrome, pituitary insufficiency, meningoencephalocele, choanal malformation |
|           | M006_3                  | P                | F   |                            | MMA/B                                                        | 20                 | CI                                | n.r.                                                               | Yes  | n.r.                                                                                                 | n.r.                                          | n.r.                                                                                             |
|           | M006_5                  | R                | F   | p.Val3933Met               | MMA/B                                                        | 28                 | CI, headache                      | None                                                               | Yes  | No                                                                                                   | n.r.                                          | No                                                                                               |
|           | M007_4                  | P                | M   | p.Asp4013Asn               | MMA/B                                                        | 3                  | CI, headache                      | None                                                               | n.r. | No                                                                                                   | n.r.                                          | No                                                                                               |
|           | M007_5                  | R                | F   |                            | MMA/B                                                        | 1.5                | CI, TIA, epilepsy                 | None                                                               | n.r. | No                                                                                                   | n.r.                                          | No                                                                                               |
|           | M008_4                  | P                | F   | p.Arg4019Cys; p.Glu4042Lys | MMA/B                                                        | 40                 | CI                                | None                                                               | Yes  | No                                                                                                   | n.r.                                          | Right thumb malformation, facial dysmorphism, short stature                                      |
|           | M009_3                  | P                | F   | p.P395Leu                  | MMA/B                                                        | <14                | TIA, movement disorder, headache  | None                                                               | No   | No                                                                                                   | n.r.                                          | No                                                                                               |
|           | M010_10                 | R                | F   | p.P4033Leu                 | MMA/B                                                        | 10                 | CI, TIA, headache                 | None                                                               | No   | No                                                                                                   | n.r.                                          | No                                                                                               |
| [16,17]   | M010_5                  | P                | F   |                            | MMA/B                                                        | 41                 | CI, TIA                           | None                                                               | n.r. | No                                                                                                   | n.r.                                          | Livedo racemosa                                                                                  |
|           | M011_4                  | P                | F   | p.Cys118Arg;p.His4051Pro   | MMA/B                                                        | 3                  | CI                                | None                                                               | n.r. | n.r.                                                                                                 | n.r.                                          | Overweight, recurrent otitis                                                                     |
|           | M012_3                  | P                | M   | p.Leu133Met; p.Ile209Asn   | MMA/B                                                        | 29                 | CI, TIA, ICH, headache            | None                                                               | Yes  | No                                                                                                   | n.r.                                          | No                                                                                               |
|           | M013_4                  | P                | F   | p.Ala1844Thr               | MMA/B                                                        | 40                 | CI                                | None                                                               | Yes  | No                                                                                                   | n.r.                                          | No                                                                                               |
|           | M014_3                  | P                | F   | p.Arg3846His               | MMA/B                                                        | 33                 | CI, TIA                           | None                                                               | No   | No                                                                                                   | n.r.                                          | Type I diabetes                                                                                  |
|           | M015_7                  | P                | M   | p.Ala4399Thr               | MMA/B                                                        | 49                 | CI                                | None                                                               | No   | No                                                                                                   | n.r.                                          | Lentigo maligna melanoma                                                                         |

**Table S1:** Demographical, clinical, and radiological features of European patients already reported in literature.

| Reference | Patient ID <sup>1</sup> | Proband Relative | Sex  | Mutation                          | MMA/other cerebrovascular condition/ bilateral or unilateral | Age at onset (yrs) | MMA symptoms                                                                  | Atypical angiographic features                                                                        | HBP  | Extracerebral arterial or cardiac anomalies                                                                                                    | Hypertransaminasemia/Hepatitis                                                                | Other systemic features                                                 |
|-----------|-------------------------|------------------|------|-----------------------------------|--------------------------------------------------------------|--------------------|-------------------------------------------------------------------------------|-------------------------------------------------------------------------------------------------------|------|------------------------------------------------------------------------------------------------------------------------------------------------|-----------------------------------------------------------------------------------------------|-------------------------------------------------------------------------|
| [16,17]   | M016_3                  | P                | F    | p.Pro4608Ser                      | MMA/B                                                        | 37                 | CI, headache, epilepsy                                                        | None                                                                                                  | No   | No                                                                                                                                             | n.r.                                                                                          | No                                                                      |
|           | M017_4                  | P                | F    | p.Gly4640Ser                      | MMA/B                                                        | 18                 | ICH                                                                           | None                                                                                                  | Yes  | n.r.                                                                                                                                           | n.r.                                                                                          | No                                                                      |
|           | M018_3                  | P                | F    | p.Ala4399Thr                      | MMA/B                                                        | 36                 | CI, TIA                                                                       | Stenosis of the distal MCA M1 segment without neovessels on the right side; ostial vertebral stenosis | Yes  | No                                                                                                                                             | n.r.                                                                                          | No                                                                      |
|           | M019_7                  | P                | M    |                                   | MMA/B                                                        | 27                 | CI, epilepsy                                                                  | Posterior cerebral arteries                                                                           | No   | n.r.                                                                                                                                           | n.r.                                                                                          | No                                                                      |
|           | M019_3                  | R                | F    | p.Ala3927Thr                      | MMA/B                                                        | 55                 | CI                                                                            | Vertebrobasilar impairment                                                                            | Yes  | No                                                                                                                                             | n.r.                                                                                          | Hypothyroidism                                                          |
|           | M019_5                  | R                | M    |                                   | Stenosis of the left ACA A1 segment without neovessels       | 59                 | n.r.                                                                          | n.r.                                                                                                  | Yes  | n.r.                                                                                                                                           | n.r.                                                                                          | Varicosis                                                               |
| [18]      | III.n.r.9               | P                | F    |                                   | MMA/B                                                        | 4                  | Left-sided weakness and aphasia brought on by excitement, persistant headache | n.r.                                                                                                  | n.r. | n.r.                                                                                                                                           | n.r.                                                                                          | n.r.                                                                    |
|           | III.n.r.1               | R                | M    | p.Lys4185Glu                      | MMA/n.r.                                                     | 5                  | Stroke                                                                        | n.r.                                                                                                  | n.r. | n.r.                                                                                                                                           | n.r.                                                                                          | n.r.                                                                    |
|           | III.n.r.2               | R                | F    |                                   | MMA/n.r.                                                     | n.r.               | Movement disorder                                                             | n.r.                                                                                                  | n.r. | n.r.                                                                                                                                           | n.r.                                                                                          | n.r.                                                                    |
|           | II.n.r.7                | R                | F    |                                   | MMA/n.r.                                                     | 21                 | Stroke                                                                        | n.r.                                                                                                  | n.r. | n.r.                                                                                                                                           | n.r.                                                                                          | n.r.                                                                    |
| [21]      | Patient 1               | P                | F    | p.Thr4114Arg                      | MMA/B                                                        | 0.8                | Status epilepticus with decreased movement in the left upper limb             | None                                                                                                  | No   | Arterial vessels throughout the cerebrovascular circulation and the femoral arteries were small in caliber, femoral arteries laterally located | n.r.                                                                                          | n.r.                                                                    |
|           | Patient 2, MM194        | P                | M    | p.Pro3996_Cys3997 delinsGlyLeuGly | MMA/B                                                        | 0.6                | Seizures                                                                      | None                                                                                                  | Yes  | Bilateral renal artery stenosis, iliac artery occlusion                                                                                        | Levetiracetam was initiated, elevated transaminases resolved with transition to oxcarbazepine | Hypertensive dilated cardiomyopathy, antiphospholipid antibody syndrome |
|           | Patient 3, MM169        | P                | M    | p.Phe4120Leu                      | MMA/B                                                        | 1.25               | Right-sided paralysis and seizures                                            | None                                                                                                  | Yes  | Bilateral renal artery stenosis, aorto-left renal artery bypass due to stenosis at 23 yrs                                                      | n.r.                                                                                          | Hypothyroidism                                                          |
| [8]       | n.r.                    | P                | n.r. | p.Asn3962Asp                      | MMA/n.r.                                                     | n.r.               | n.r.                                                                          | n.r.                                                                                                  | n.r. | n.r.                                                                                                                                           | n.r.                                                                                          | n.r.                                                                    |
|           | CAU_ped1_12             | P                | n.r. |                                   | Mild ischemic stroke at the age of 30                        |                    | n.r.                                                                          | n.r.                                                                                                  | n.r. | n.r.                                                                                                                                           | n.r.                                                                                          | n.r.                                                                    |
|           | CAU_Ped1_122            | R                | n.r. | p.Asp4013Asn                      | MMA/n.r.                                                     | 5                  | n.r.                                                                          | n.r.                                                                                                  | n.r. | n.r.                                                                                                                                           | n.r.                                                                                          | n.r.                                                                    |
|           | CAU_Ped1_123            | R                | n.r. |                                   | MMA/n.r.                                                     | 9                  | Symptoms of involuntary movement                                              | n.r.                                                                                                  | n.r. | n.r.                                                                                                                                           | n.r.                                                                                          | n.r.                                                                    |
|           | CAU_Ped1_124            | R                | n.r. |                                   | MMA/n.r.                                                     | 3                  | Ischemic stroke                                                               | n.r.                                                                                                  | n.r. | n.r.                                                                                                                                           | n.r.                                                                                          | n.r.                                                                    |
|           | n.r.                    | P                | n.r. | p.Arg4062Gln                      | MMA/n.r.                                                     | n.r.               | n.r.                                                                          | n.r.                                                                                                  | n.r. | n.r.                                                                                                                                           | n.r.                                                                                          | n.r.                                                                    |
|           | n.r.                    | P                | n.r. | p.Pro4608Ser                      | MMA/n.r.                                                     | n.r.               | n.r.                                                                          | n.r.                                                                                                  | n.r. | n.r.                                                                                                                                           | n.r.                                                                                          | n.r.                                                                    |

<sup>1</sup>As reported in the published article (see reference). Abbreviations: B = bilateral; U = unilateral; CAD = premature coronary artery disease; CI = cerebral infarct; F = female; HBP = high blood pressure; ICA = internal carotid artery; ICAO = internal carotid artery occlusion; ICH = intracerebral brain hemorrhage; ID = patient identifier; L = left; M = male; MCA = middle cerebral artery; MMA = moyamoya angiopathy; MMD = moyamoya disease; TIA = transient ischemic attack; n.a. = not available; n.r. = not reported.
